# Supplementary material for: A fluorinated COF-encapsulated CeO 2 @Pt sandwich catalyst enables dual interfacial-electronic modulation for liquid-phase hydrogenation
Source: Royal Society of Chemistry journal article supplement (doi:10.1039/d5ta06984j), 2025-01-01
Supplement: d5ta06984j1.pdf [file d5ta06984j1.pdf]

## Supporting Information

### **Fluorinated COF-Encapsulated CeO<sub>2</sub>@Pt Sandwich Catalyst Enables Dual Interfacial-Electronic Modulation for Liquid-Phase Hydrogenation**

Rongyao Wang<sup>a, b#</sup>, Peiao Cong<sup>a#</sup>, Shuai Wang<sup>a</sup>, Luqing Zhang<sup>a\*</sup>, Daowei Gao<sup>a</sup>,  
Guozhu Chen<sup>a\*</sup>

*a School of Chemistry and Chemical Engineering, University of Jinan, Jinan, Shandong Province, 250022 P.R. China.*

*b School of Water Conservancy and Environment, University of Jinan, Jinan, 250022, Province, 250022 P.R. China.*

<sup>#</sup> Rongyao Wang and Peiao Cong contributed equally to this work.

\*Corresponding authors:

Email: chm\_chengz@ujn.edu.cn (Guozhu Chen)

E-mail: chm\_zhanglq@ujn.edu.cn (Luqing Zhang)

## **Text S1 Catalyst synthesis**

**Synthesis of Pt nanoparticles (Pt NPs).** 16.6 mg of PVP was dissolved in 45 mL of ethanol, followed by the dropwise addition of 5.0 mL of  $\text{H}_2\text{PtCl}_6$  (6.0 mM). After stirring for 2 minutes at room temperature, the mixture was transferred to a three-neck flask with a capacity of 100 mL and heated at 90 °C for a duration of 3 h to synthesize Pt nanoparticles stabilized by PVP.

**Synthesis of  $\text{CeO}_2$ .** 4 g of  $\text{Ce}(\text{NO}_3)_3 \cdot 6\text{H}_2\text{O}$ , 1.6 g PVP, and 4.2 mL of deionized water were dispersed in 120 mL of ethylene glycol and stirred at room temperature for 30 minutes. The mixture was then heated at 160°C for 8 h, cooled to room temperature, centrifuged at 9800 rpm for 15 min, and purified three times with ultrapure water and absolute ethanol successively. The solid obtained was dried in vacuum and further calcined at 300°C for 1 h in a muffle furnace. Finally, a light yellow  $\text{CeO}_2$  powder was obtained.

## Text S2. DFT Computational details

All calculations were performed using the spin-polarized density functional theory (DFT) method through Vienna Ab initio Simulation Package (VASP5.4.4) <sup>[1,2]</sup>. Generalized gradient approximation (GGA) of Perdew-Burke Ernzerhof (PBE) were adopted to describe exchange correlation interaction <sup>[3]</sup>. The ion-electron interaction was treated using the projector augmented wave (PAW) technique <sup>[4]</sup>. The plane-wave cutoff energy of 450 eV was employed. The atomic positions were fully relaxed until the maximum force on each atom was less than 0.02 eV/Å. The Brillouin zone was sampled using the Monkhorst-Pack scheme with a k-point mesh of 2×2×1 in the  $\Gamma$ -centered grids for the structural relaxation. Van der Waals interaction was considered using the semiempirical DFT-D3 approach <sup>[5]</sup>. A vacuum distance of ~15 Å was used to avoid interactions between neighboring layers. A Pt cluster supported on CeO<sub>2</sub>(111) was used as the representative model to approximate surface undercoordinated Pt sites. This model captures local charge redistribution trends, while the experimentally observed Pt nanoparticles (~3.3 nm, Fig. S1) provide the realistic size context.

The adsorption energies  $E_{Ads}$  of styrene species on various surfaces were calculated using the equation:

$$E_{Ads} = E_{cat-mol} - E_{cat} - E_{mol}$$

Where  $E_{cat-mol}$  is the total energy after adsorption of CeO<sub>2</sub>@Pt@TAFA and styrene species,  $E_{cat}$  is the energy after optimization of the CeO<sub>2</sub>@Pt@TAFA catalyst and  $E_{mol}$  is the energy after optimization of styrene species.

### Text S3. Molecular dynamics simulations

The molecular dynamics (MD) simulations of  $\text{CeO}_2@\text{Pt}@\text{TPA-H}_2$ ,  $\text{CeO}_2@\text{Pt}@\text{TAFA-H}_2$ ,  $\text{CeO}_2@\text{Pt}@\text{TPA-styrene}$ , and  $\text{CeO}_2@\text{Pt}@\text{TAFA-styrene}$  systems were carried out using the LAMMPS software package. The universal force field (UFF) was employed to describe the COF with full atomistic detail, while the water molecules were modeled using the SPCE force field. A cutoff radius of 10 Å was applied for van der Waals interactions, and long-range electrostatic interactions were treated using the particle–particle particle–mesh (PPPM) method. Each system was first equilibrated under the NPT ensemble at 300 K for 1 ns, followed by a 1 ns equilibration under the NVT ensemble at 1 atm. Subsequently, a 3 ns production run was performed under the NVT ensemble with a time step of 1 fs. The temperature was controlled using the Nosé–Hoover thermostat, while pressure was regulated via the Berendsen barostat. Based on the resulting simulation trajectories, the mean square displacement (MSD) was calculated using the standard expression.

$$MSD(\Delta t) = \langle |\Delta \vec{r}(\Delta t)|^2 \rangle = \frac{1}{N} \sum_{i=1}^N \langle |\vec{r}_i(t_i + \Delta t) - \vec{r}_i(t_i)|^2 \rangle$$

where  $t$  denotes time and  $\vec{r}(t)$  represents the position vector of the diffusing molecules.

All simulations were conducted under periodic boundary conditions.

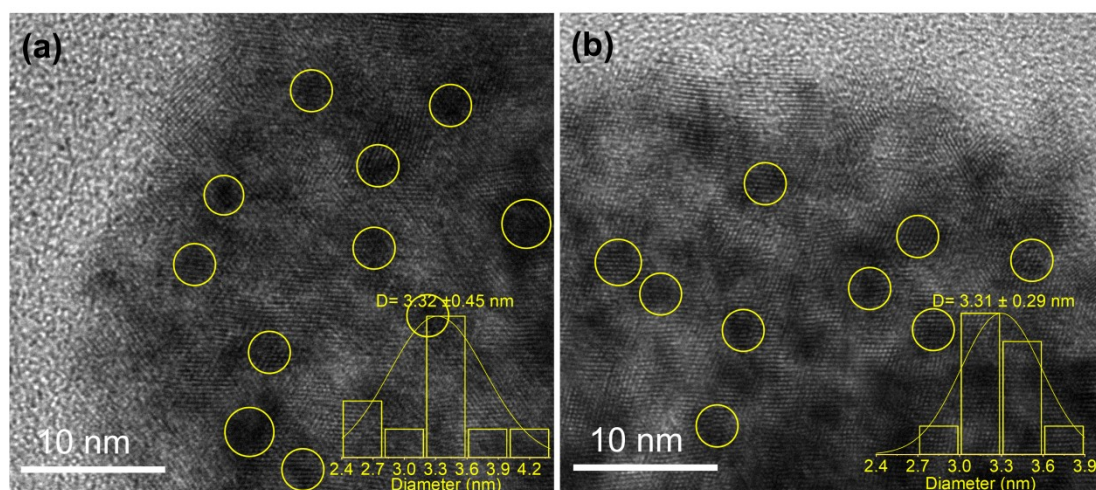

**Fig. S1** HRTEM images of (a) CeO<sub>2</sub>@Pt@TPA and CeO<sub>2</sub>@Pt@TAFA.

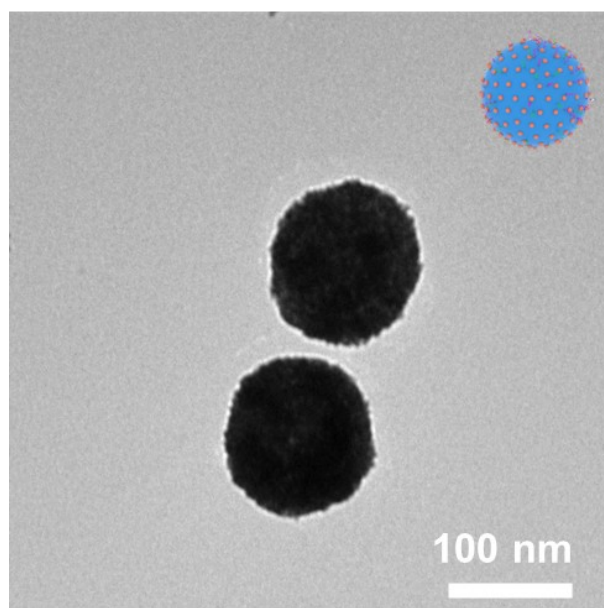

**Fig. S2** TEM image of CeO<sub>2</sub>@Pt-PB.

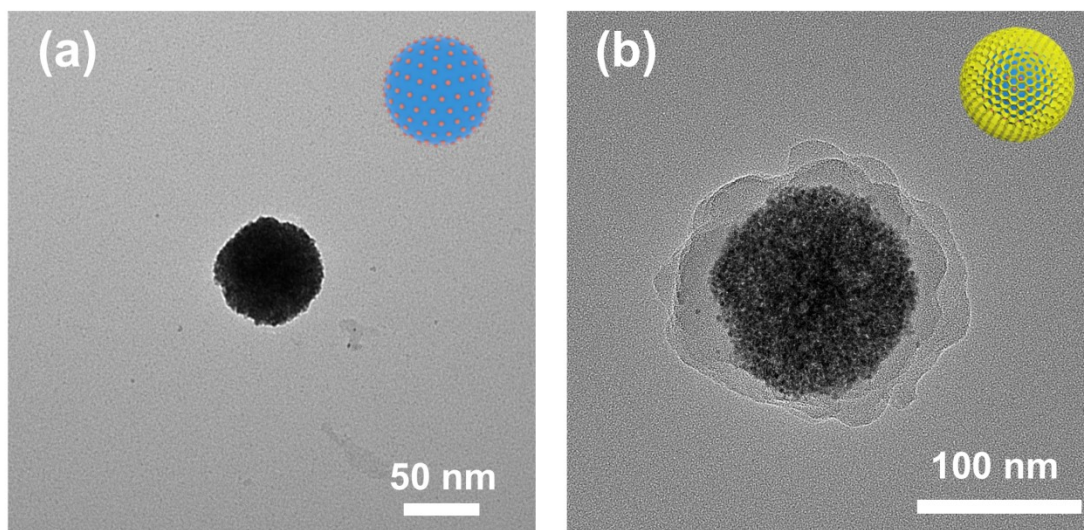

**Fig. S3** TEM image of  $\text{CeO}_2@\text{Pt}$  and  $\text{CeO}_2@\text{Pt-TAFA}$ .

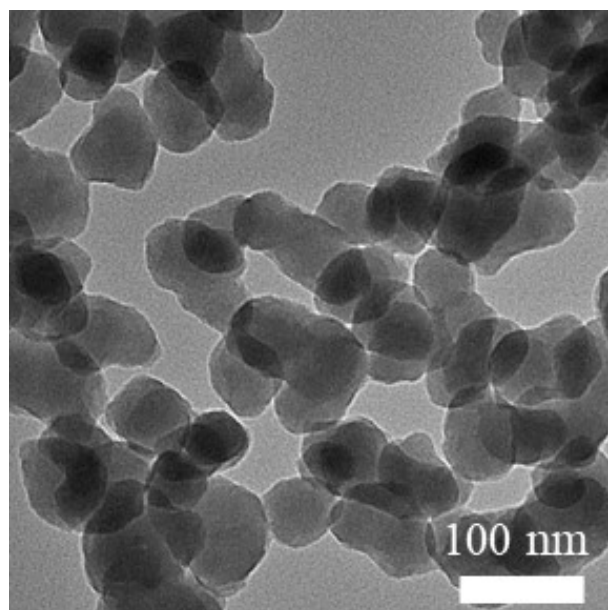

**Fig. S4** TEM image of TAFA.



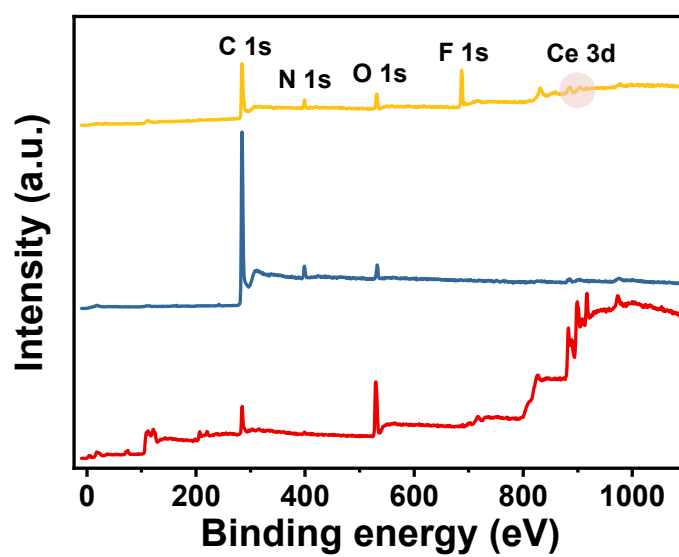

**Fig. S5** XPS of  $\text{CeO}_2@\text{Pt}$ ,  $\text{CeO}_2@\text{Pt}@\text{TPA}$ , and  $\text{CeO}_2@\text{Pt-TAFA}$ .

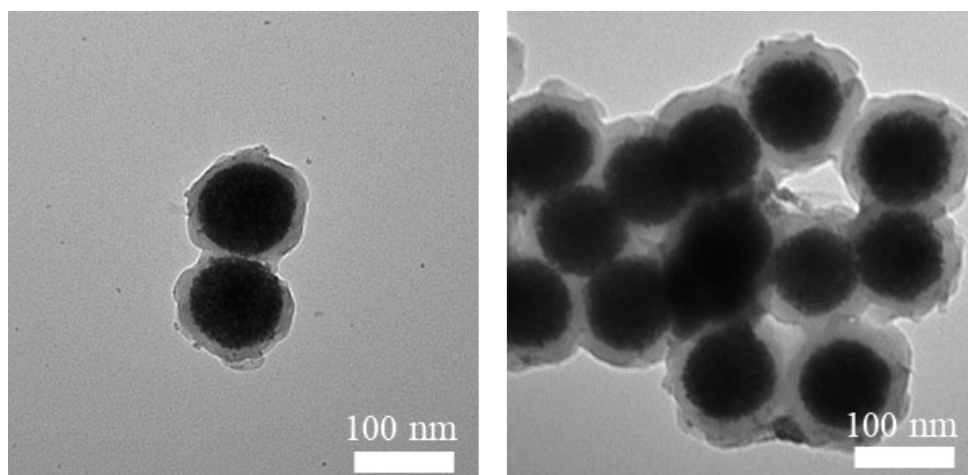

**Fig. S6** TEM image of  $\text{CeO}_2@\text{Pt}@\text{TAFA}$  after reaction.

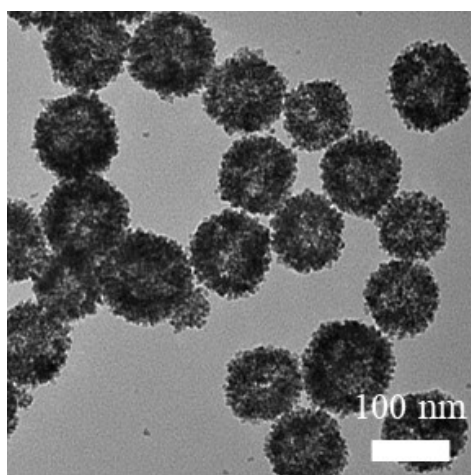

**Fig. S7** TEM image of  $\text{CeO}_2@\text{Pt}$  after reaction.

1. Direct hydrogenation  
with dissociated  $H_2$

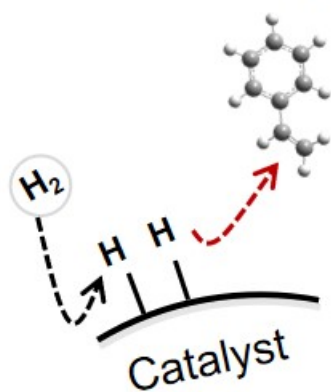

2. Water-assisted  
hydrogen exchange

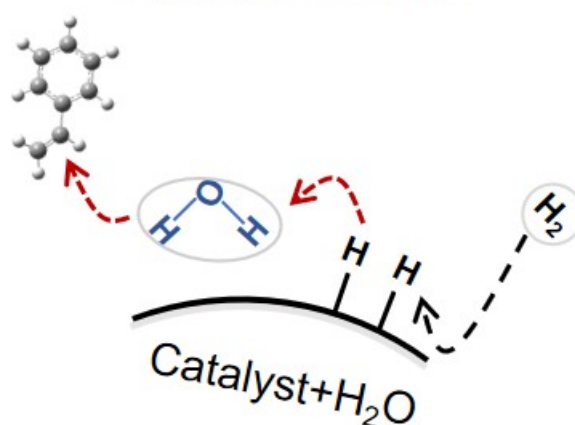

**Fig. S8** Schematic illustration of two possible reaction pathways for the hydrogenation process of styrene.

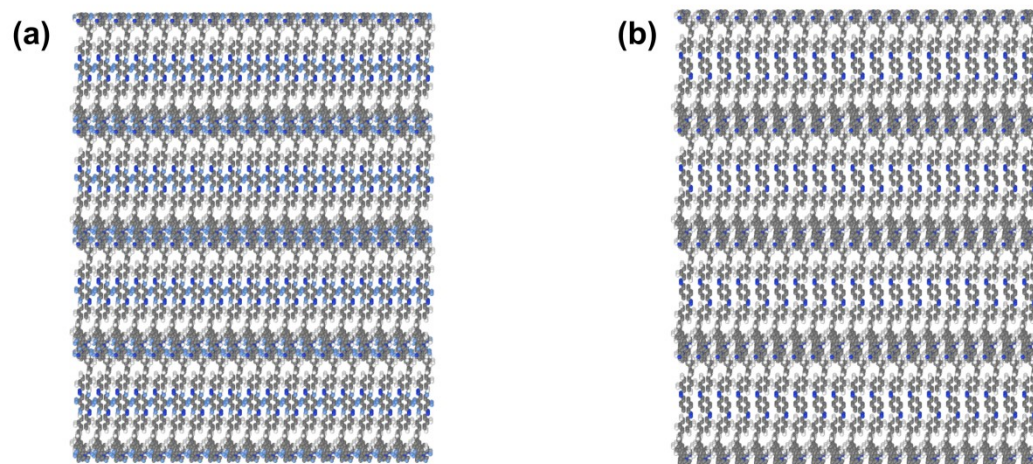

**Fig. S9** The structures of (a) TAFA and (b) TPA shells.

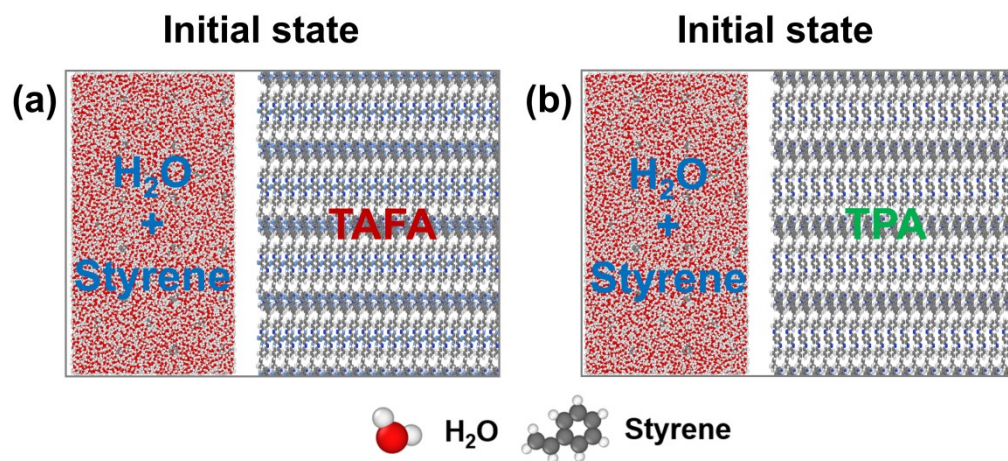

**Fig. S10** The snapshot of initial state in the styrene diffusion simulation of (a) TAFA and (b) TPA shells.



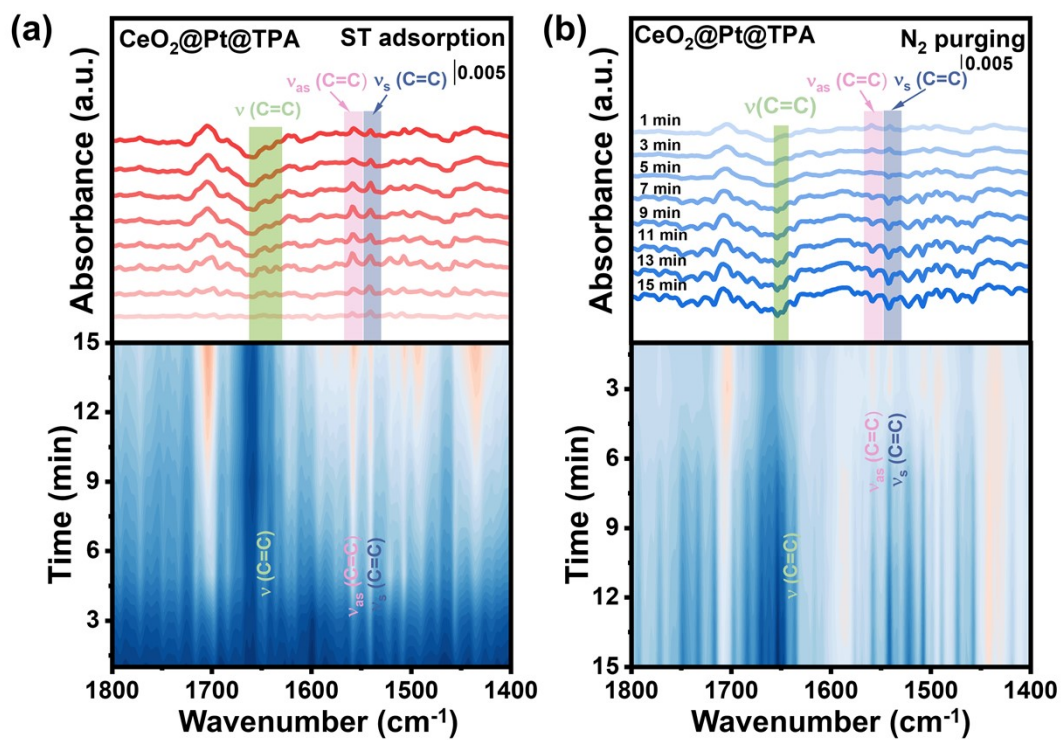

**Fig. S12** In situ DRIFTS spectra of (a) styrene adsorption and (b)  $\text{N}_2$  purge on  $\text{CeO}_2@\text{Pt}@\text{TPA}$  at room temperature.



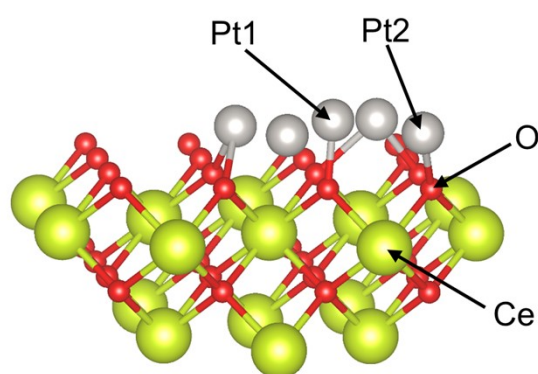

| Atom      | Pt1    | Pt2    | O      | Ce   |
|-----------|--------|--------|--------|------|
| Bader (e) | -0.138 | -0.411 | -0.844 | 1.86 |

**Fig. S13** An optimized structural model of CeO<sub>2</sub>@Pt (top), and calculated Bader charges (bottom).

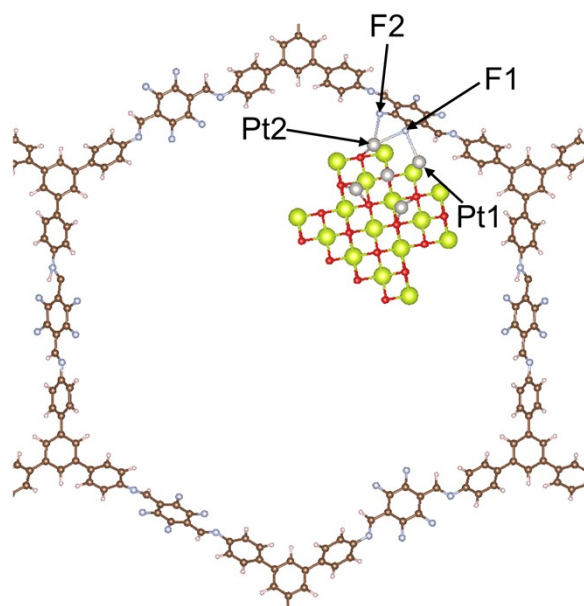

| Atom      | Pt1    | Pt2  | F1   | F2   |
|-----------|--------|------|------|------|
| Bader (e) | -0.133 | 0.03 | 0.63 | 0.61 |

**Fig. S14** An optimized structural model of CeO<sub>2</sub>@Pt@TAFA (top), and calculated Bader charges (bottom).

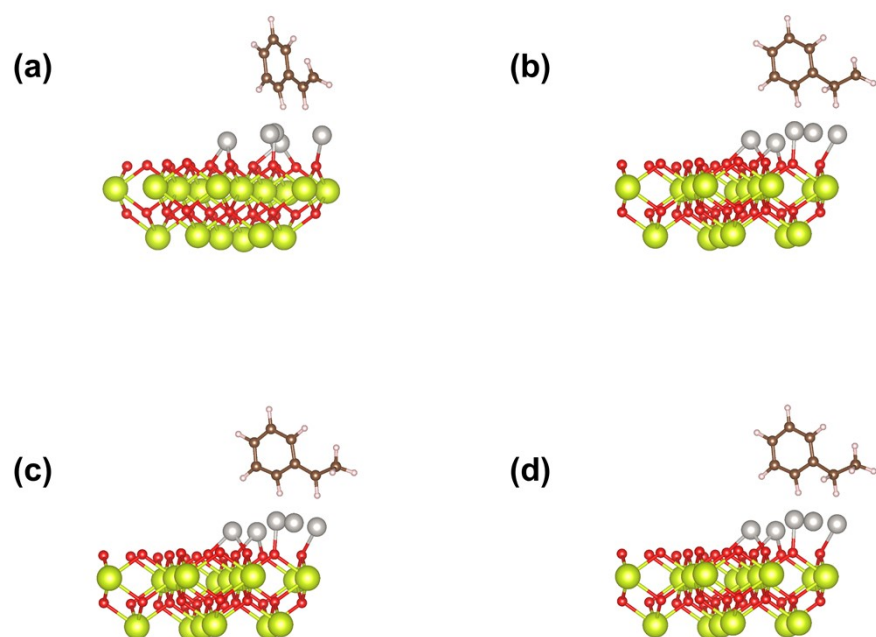

**Fig. S15** Structure of the hydrogenation pathway of styrene in CeO<sub>2</sub>@Pt@ system.

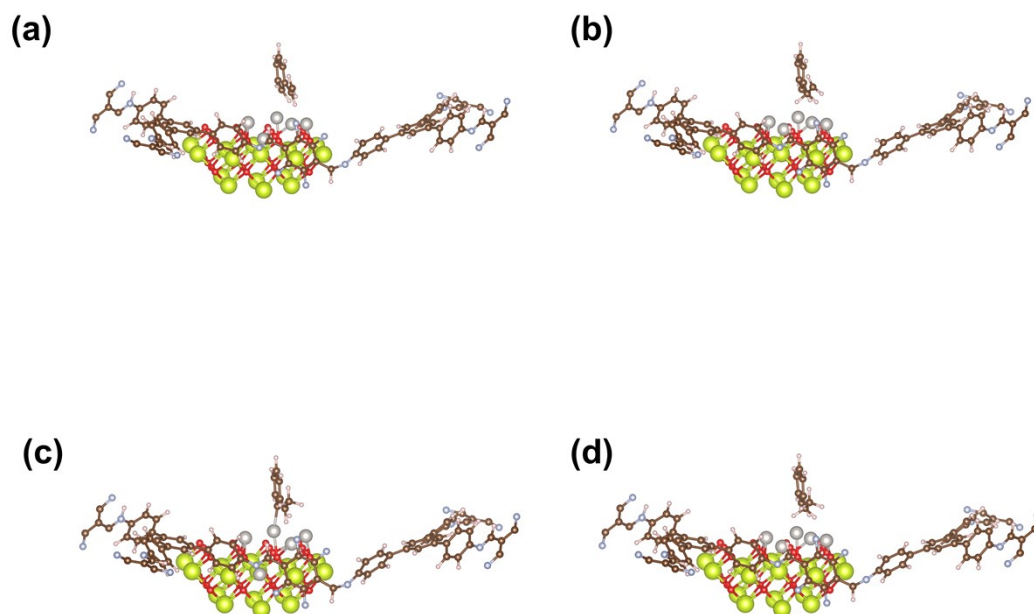

**Fig. S16** Structure of the hydrogenation pathway of styrene in  $\text{CeO}_2@\text{Pt}@\text{TAFA}$  system.

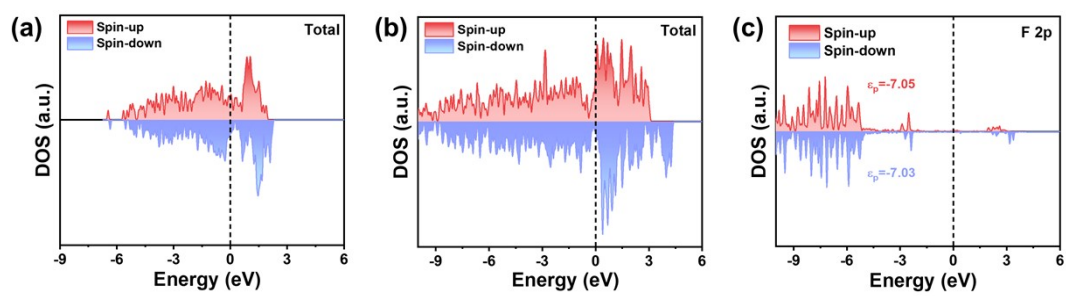

**Fig. S17** Total Density of states (DOS) of (a)  $\text{CeO}_2@\text{Pt}$  and (b)  $\text{CeO}_2@\text{Pt}@\text{TAFA}$ . (c) DOS of F in  $\text{CeO}_2@\text{Pt}@\text{TAFA}$ .

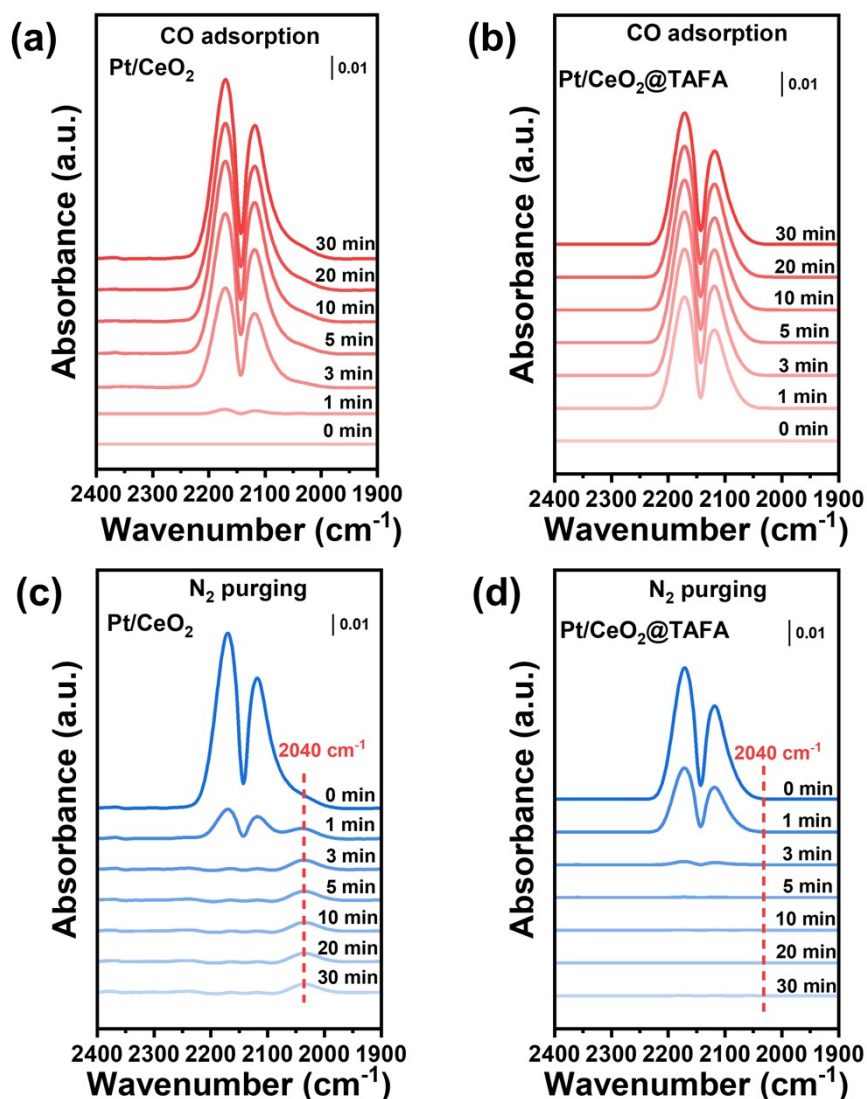

**Fig. S18** Schematic illustration of two possible reaction pathways for the hydrogenation process of CO.

CO adsorption experiments provided further evidence for the electronic and spatial modulations introduced by the TAFA shell. Specifically, in situ DRIFTS analysis revealed characteristic bands associated with linear CO adsorption on metallic Pt<sup>0</sup> centers (**Figs. S18a, b**). Upon N<sub>2</sub> purging, a weak shoulder at ~2040 cm<sup>-1</sup>, corresponding to bridged CO species (Pt–CO–Pt), appeared in CeO<sub>2</sub>@Pt (**Fig. S18c**), indicating the presence of contiguous, electron-rich Pt ensembles. In contrast, this

bridged CO band was absent in CeO<sub>2</sub>@Pt@TAFA (**Fig. S18d**), suggesting significant alterations in both the electronic structure and spatial configuration of Pt sites. This change likely results from (i) reduced Pt–Pt proximity due to steric confinement within the TAFA shell, and (ii) electron depletion at Pt centers induced by the electron-withdrawing fluorinated matrix, which suppresses multi-site adsorption. These findings are supported by DFT-derived Bader charge analysis and d-band center shifts, confirming the formation of electron-deficient Pt<sup>δ+</sup> species. Altogether, the elimination of bridged CO adsorption highlights the dual-interface modulation, via electronic tuning and spatial isolation, as a key factor in achieving superior aqueous-phase hydrogenation performance.

**Table 1 BET data statistics**

| Entry | Samples                   | Pt<br>loading ( wt<br>%) | BET surface<br>area ( m <sup>2</sup> ·g <sup>-1</sup> ) | V <sub>t</sub> ( cm <sup>3</sup> ·g <sup>-1</sup> ) | d <sub>BJH</sub> ( nm ) |
|-------|---------------------------|--------------------------|---------------------------------------------------------|-----------------------------------------------------|-------------------------|
| 1     | CeO <sub>2</sub> @Pt      | 0.98                     | 120.31                                                  | 0.28                                                | 8.49                    |
| 2     | CeO <sub>2</sub> @Pt-PB   | 0.87                     | 127.47                                                  | 0.32                                                | 9.17                    |
| 3     | CeO <sub>2</sub> @Pt@TPA  | 0.76                     | 124.7                                                   | 0.21                                                | 8.33                    |
| 4     | CeO <sub>2</sub> @Pt@TAFA | 0.73                     | 137.63                                                  | 0.23                                                | 8.21                    |



## References

- [1] Kresse, G.; Hafner, J. Ab Initio Molecular Dynamics for OpenShell Transition Metals. *Phys. Rev. B* 1993, 48 (17), 13115–13118.
- [2] Kresse, G.; Hafner, J. Ab Initio Molecular Dynamics for Liquid Metals. *Phys. Rev. B* 1993, 47 (1), 558–561.
- [3] Perdew, J. P.; Burke, K.; Ernzerhof, M. Generalized Gradient Approximation Made Simple. *Phys. Rev. Lett.* 1996, 77 (18), 3865–3868.
- [4] Kresse, G.; Joubert, D. From Ultrasoft Pseudopotentials to the Projector Augmented-Wave Method. *Phys. Rev. B* 1999, 59 (3), 1758–1775.
- [5] Grimme, S.; Antony, J.; Ehrlich, S.; Krieg, H. A Consistent and Accurate Ab Initio Parametrization of Density Functional Dispersion Correction (DFT-D) for the 94 Elements H-Pu. *J. Chem. Phys.* 2010, 132 (15), 154104.
